# Supplementary material for: Solitary Fibrous Tumor/Hemangiopericytoma Metastasizes Extracranially, Associated with Altered Expression of WNT5A and MMP9
Source: Cancers (Basel). 2021 Mar 7;13(5):1142. doi: 10.3390/cancers13051142 (PMC7962064; doi:10.3390/cancers13051142)
Supplement: Supplementary file 1 [file cancers-13-01142-s001.pdf]

**Supplementary Table S1. Baseline characteristics of the patients with primary SFT/HPC**

|                          |                   | <i>ex</i> SFT/HPC<br>(No. of patients = 32) | <i>ic</i> SFT/HPC<br>(No. of patients = 18) |
|--------------------------|-------------------|---------------------------------------------|---------------------------------------------|
| Age (yrs)                | Median (range)    | 53 (23–79)                                  | 49 (22–78)                                  |
| Sex                      | Male              | 13 (41%)                                    | 9 (50%)                                     |
|                          | Female            | 19 (59%)                                    | 9 (50%)                                     |
| Size (cm)                | Median (range)    | 8.5 (1.7–21.0)                              | 4.7 (1.5–7.0)                               |
| Histologic grade         | Benign/grade 2    | 23 (72%)                                    | 9 (50%)                                     |
|                          | Malignant/grade 3 | 9 (28%)                                     | 9 (50%)                                     |
| Post-operative treatment | Chemotherapy      | 1 (3%)                                      | 1 (6%)                                      |
|                          | Radiation         | 3 (9%)                                      | 10 (56%)                                    |
| Recurrence               | Local             | 3 (9%)                                      | 5 (28%)                                     |
|                          | Distant           | 2 (6%)                                      | 3 (17%)                                     |

*ic*SFT/HPC, intracranial solitary fibrous tumor/hemangiopericytoma; *ex*SFT/HPC, extracranial solitary fibrous tumor/hemangiopericytoma.

**Supplementary Table S2.** Clinical information on intracranial SFT/HPC cases with extracranial metastasis

|                                 | Case 1          | Case 2         | Case 3          | Case 4           | Case 5         | Case 6             |
|---------------------------------|-----------------|----------------|-----------------|------------------|----------------|--------------------|
| Age(yrs)/ Sex                   | 34/F            | 55/F           | 39/M            | 36/F             | 57/F           | 29/F               |
| Intracranial location           | Right tentorium | Sphenoid ridge | Right tentorium | Right cerebellum | Occipital lobe | Temporal lobe      |
| Metastatic organ                | Liver           | C7 vertebrae   | T9 vertebrae    | Lung             | Lung           | Pelvic soft tissue |
| Initial tumor grade             | Grade 2         | NA             | Grade 3         | Grade 2          | Grade 3        | Grade 3            |
| Duration to metastasis (months) | 216             | 116            | 45              | 65               | 32             | 84                 |

## Supplementary Figure S1.

A

Extracranial SFT/HPC

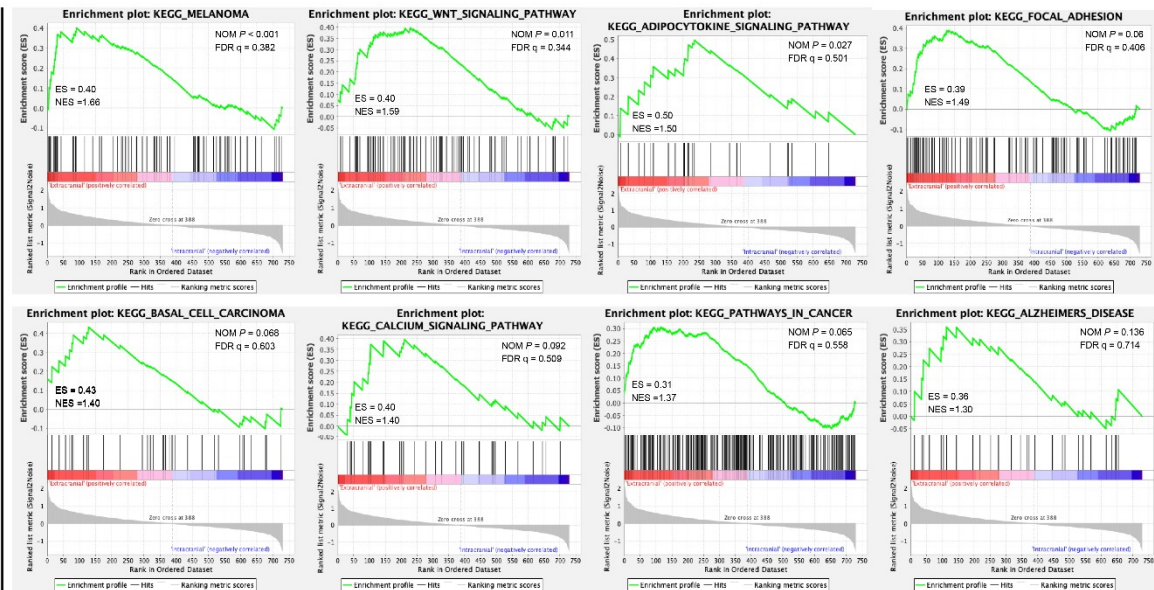

B

Intracranial SFT/HPC

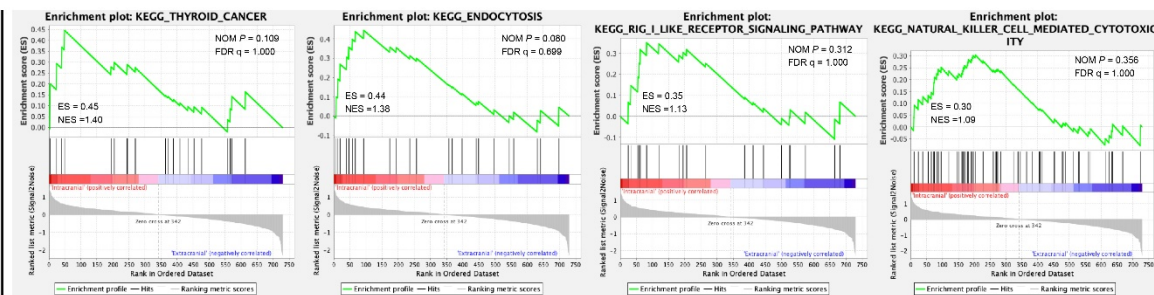

**Supplementary Figure S1.** Gene set enrichment analysis (GSEA) enrichment plot (score curves) using Nanostring data comparing *ic*SFT/HPC and *ex*SFT/HPC. (A) KEGG gene sets enriched in *ex*SFT/HPC. (B) KEGG gene sets enriched in *ic*SFT/HPC.

## Supplementary Figure S2.

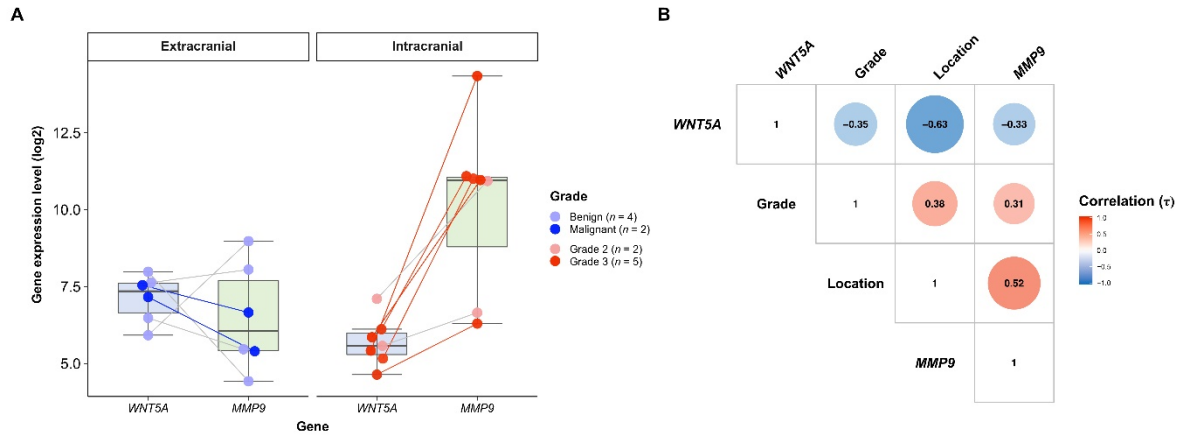

**Supplementary Figure S2.** Differential expression of *WNT5A* and *MMP9* according to tumor location and grade. (A) Paired boxplots of *WNT5A* and *MMP9* showed that the difference in the expression of *WNT5A* and *MMP9* was greater in *ic*SFT/HPC compared to *ex*SFT/HPC. (B) Correlogram showing that expression of *WNT5A* was positively correlated with an extracranial location and that expression of *MMP9* with an intracranial location. The intracranial location was coded as a positive value, and the extracranial location as a negative value.

**Supplementary Figure S3.**

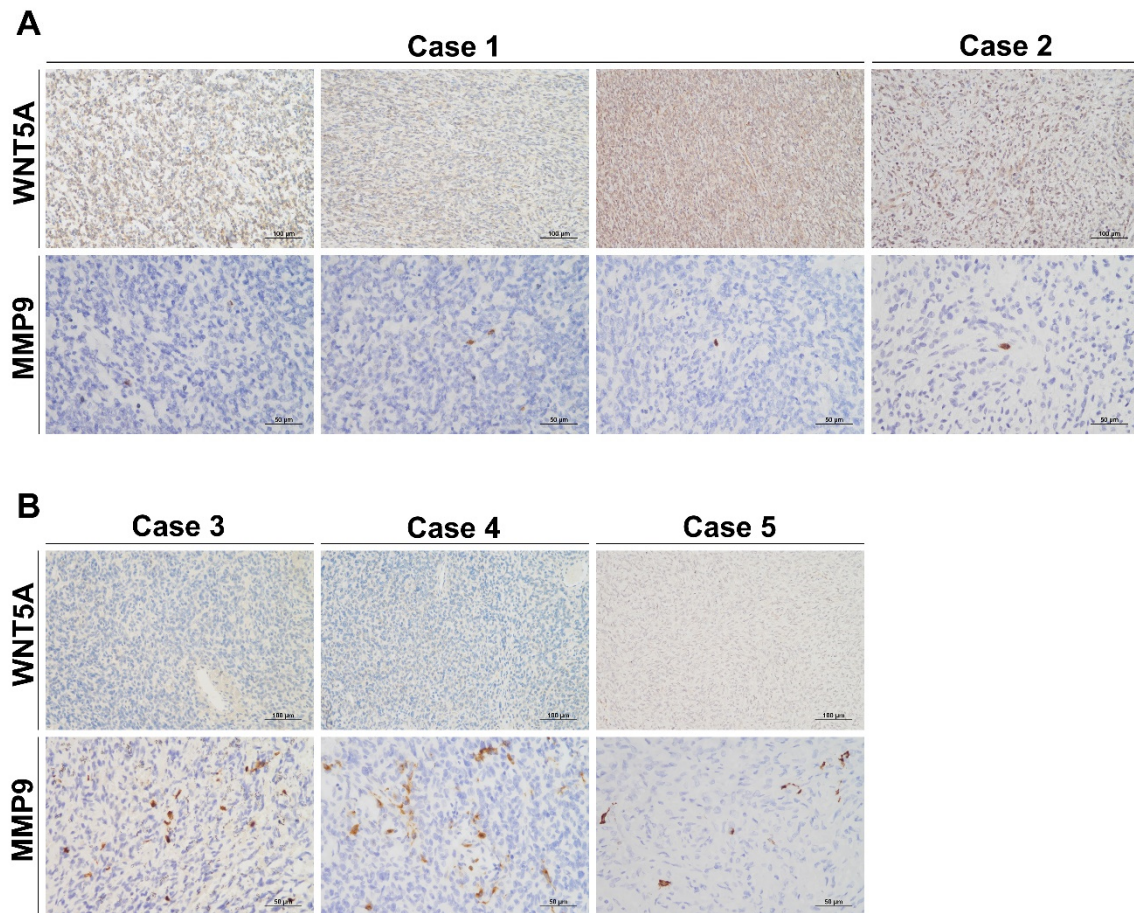

**Supplementary Figure S3.** Immunohistochemistry of WNT5A and MMP9 in cases of *exSFT/HPC* and *icSFT/HPC* exhibiting local recurrence. (A) Two cases of *exSFT/HPC* (cases 1 and 2) with local recurrence maintained high expression of WNT5A and low expression of MMP9. Case 1 of *exSFT/HPC* showed multiple recurrences, and tumor samples were obtained three times after initial resection. (B) Three cases of *icSFT/HPC* (cases 3, 4, and 5) with local recurrence revealed low expression of WNT5A and high expression of MMP9.
